# Supplementary material
Source: PubMed Central journal article supplement (PMC10928661)

Figure S1. Result of biopsy: Well-differentiated rectal adenocarcinoma [High-power field of H&E staining (magnification, x100)].

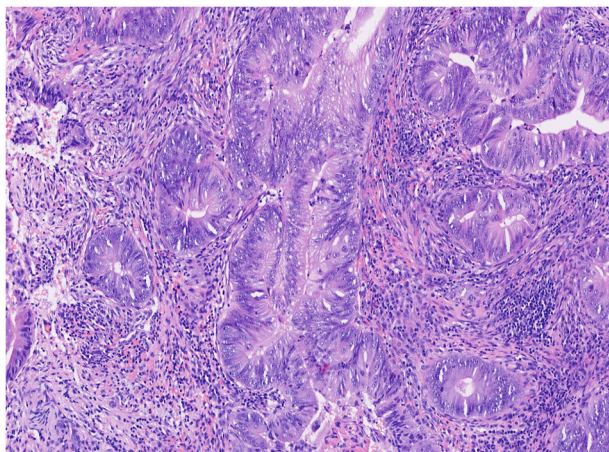

Supplement: Supplementary_Data.pdf [file Supplementary_Data.pdf]
